# Supplementary material for: Network Based Consensus Gene Signatures for Biomarker Discovery in Breast Cancer
Source: PubMed Central journal article supplement (PMC3201953; doi:10.1371/journal.pone.0025364), 2011-10-25

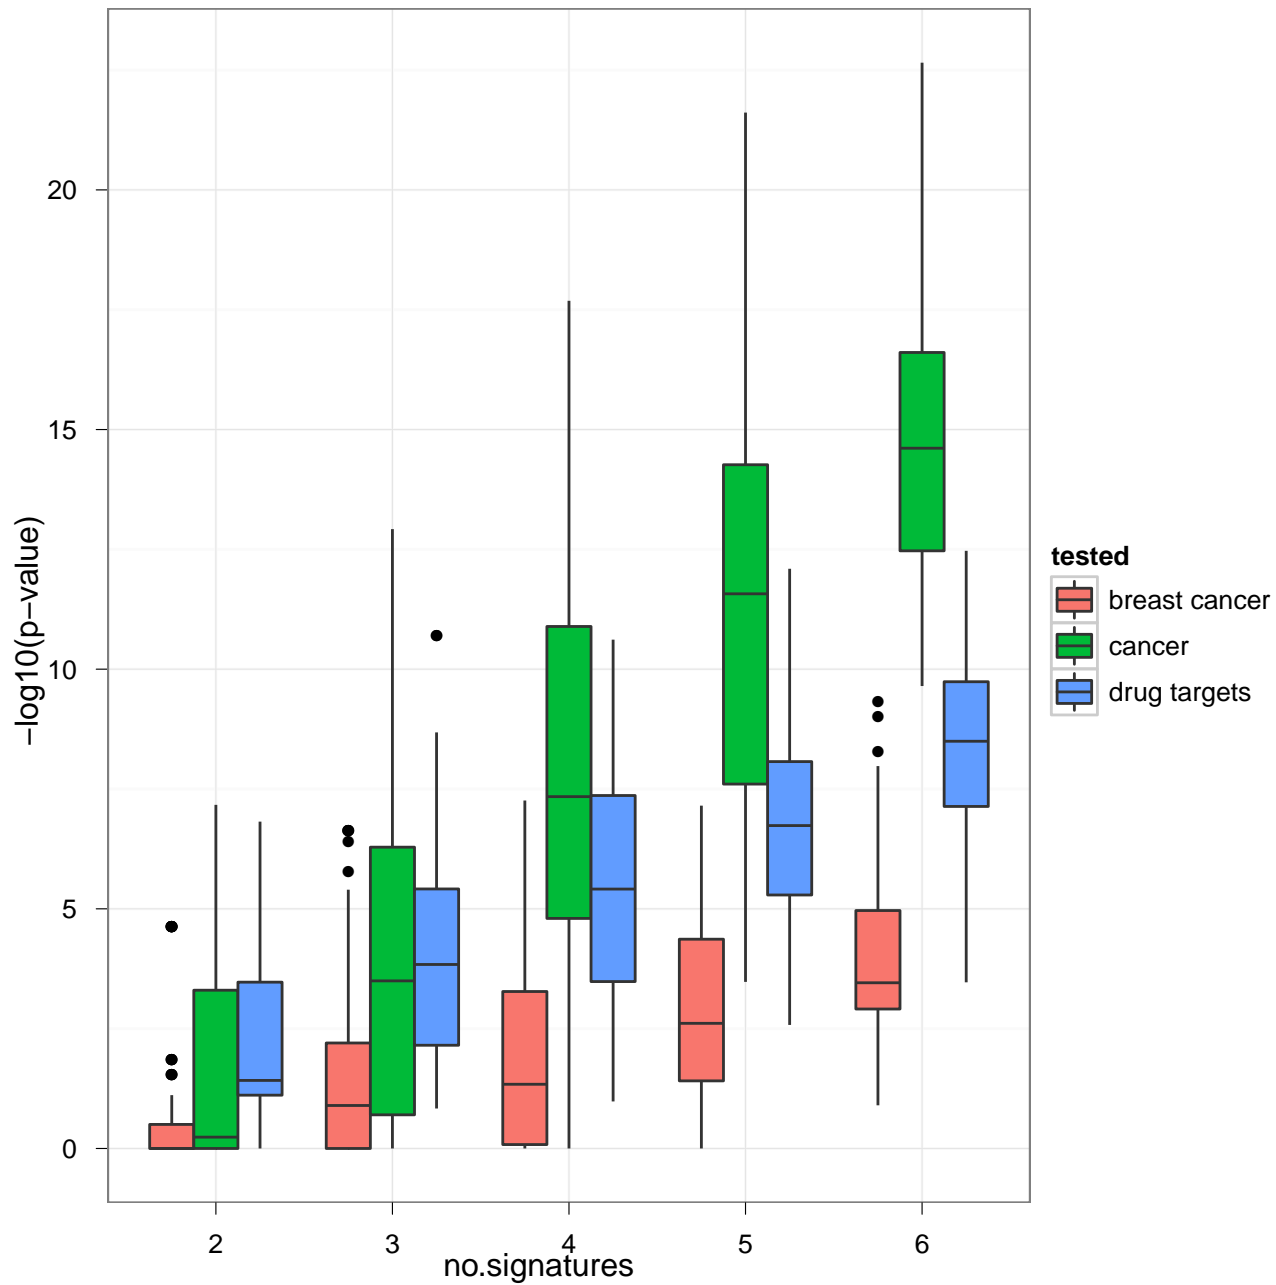

Supplement: pone.0025364.s003.pdf [file pone.0025364.s003.pdf]
